# Supplementary material
Source: PubMed Central journal article supplement (PMC6410500)
Supplement: bhw253_supplement.pdf [file bhw253_supplement.pdf]

## Supplemental Tables and Figures

Table S1. Subject measures correlating with brain-wide signal variance (DVAR)

| Subject Measures             | Pearson r |
|------------------------------|-----------|
| DSM ADHD                     | 0.16      |
| ASR Attn. Problems           | 0.16      |
| ASR Thought/Attention/Other  | 0.16      |
| DSM Antisocial (pct)         | 0.17      |
| ASR Somatic complaints (pct) | 0.17      |
| DSM Somatic problems (raw)   | 0.17      |
| ASR Intrusive thoughts       | 0.17      |
| Height                       | 0.18      |
| ASR Rule Breaking            | 0.18      |
| ASR Total problems (raw)     | 0.18      |
| ASR Critical items (raw)     | 0.18      |
| ASR Total problems (AgeAdj)  | 0.19      |
| ASR Externalizing (raw)      | 0.2       |
| DSM Somatic problems (pct)   | 0.2       |
| ASR Externalizing            | 0.2       |
| DSM Antisocial (pct)         | 0.2       |
| Anger/Aggression (Unadj)     | 0.2       |
| Brain Volume                 | 0.23      |
| Hematocrit                   | 0.27      |
| Gender (M>F)                 | 0.31      |
| BMI                          | 0.33      |
| Weight                       | 0.38      |

FD:DV  $r=.417$

## Supplemental Figure Captions

**Figure S1. Cortical Parcellation and group average correlation values.** (a) 324 region of interest parcellation from Gordon & Laumann et al., 2014. Regions are color coded by RSN membership. The average Fisher z-transformed correlation matrices are shown for all 457 subjects following Type A processing (b) and for 435 retained subjects following Type B processing (c).

1  
2  
3  
4  
5  
6  
7  
8  
9  
10  
11  
12  
13  
14  
15  
16  
17  
18  
19  
20  
21  
22  
23  
24  
25  
26  
27  
28  
29  
30  
31  
32  
33  
34  
35  
36  
37  
38  
39  
40

**Figure S2: Pervasive high frequency noise in unfiltered FD traces.** (a) The top panel shows 1200 frames of raw FD values (red trace) for subject 519950. The black line indicates a 0.2 FD cutoff for frame censoring, as implemented previously (Power et al. 2012, 2014). The panel second from the top shows FD values after low pass filtering with a 0.3Hz Butterworth filter (red trace) for the same run, with the black line indicating a 0.025 FD cutoff. The third and fourth panels show the corresponding DVARS values (blue trace), mean global signal (black trace), and gray plot. The frames that would be censored by use of the filtered FD values are well-aligned with peaks in the DVARS trace and perturbations in the gray plot characteristic of head motion (Power et al. 2012, 2014), whereas many more frames would be censored if the unfiltered FD values were used. (b) In some HCP R-fMRI runs, FD and DVARS do not correspond as well. Observe that for subject 510326 there are several peaks in the DVARS trace between frames 100 and 400 that are well-aligned with perturbations in the gray plot characteristic of head motion (Power et al. 2012, 2014); however, these peaks are not reflected in either FD trace (see black arrows). Thus, a DVAR threshold of 105% of median was used for scrubbing. (c) Spectrogram of FD traces before averaged across all runs from all subjects before (top) and after (bottom) low-pass filtering to remove the respiration peak. Prior to filtering, a peak is present above 0.3 hz (black arrow), consistent with respiration.

41  
42  
43  
44  
45  
46  
47  
48  
49  
50  
51  
52  
53  
54  
55  
56  
57  
58  
59  
60

**Figure S3: FC:FD and FD:Behavior relationships used in Figure 3 shown as matrices.** Arrows between matrices provide Pearson correlation coefficients between matrices. RSN abbreviations: VIS = Visual network (38 ROIs), PO = parieto-occipital (7 ROIs), SMD = dorsal somato-motor (37 ROIs); SMV = ventral somato-motor (8 ROIs); AUD = auditory (23 ROIs); CON = cingulo-opercular (39 ROIs); VAN = ventral attention (23 ROIs); SAL = Salience (4 ROIs), CP = Cingulo-parietal (5 ROIs), DAN = dorsal attention network (32 ROIs); FPN = frontoparietal control network (24 ROIs); DMN = default mode network (40 ROIs), NON = no assigned network (44 ROIs).

1  
2  
3 **Figure S4. Motion influence on FC: across all 457 subject.** Results presented  
4 here are calculated in a manner identical to Figure 3, except all 457 subjects  
5 (including those with reconstruction software version 1) were included.  
6  
7

8  
9 **Figure S5. Average in scanner head movement versus Body Mass Index.**  
10

## 11 Behavioral Measures

12  
13  
14  
15 To generate a list of 120 measures of potential neurobiological interest, the  
16 following exclusion criteria (adapted from Smith et al., 2015) were applied:  
17

- 18 1. 70 measures, which were quantitatively poor measures according to one  
19 more of the following criteria:  
20  
21 a. A measured contained very extreme outlier values, as measured by  
22 most extreme value from the median. Specifically, if  $x_s$  is an SM value for  
23 subject  $s$ , and  $y_s = (x_s - \text{median}(x_s))^2$ , we consider an SM to have  
24 extreme outliers if  $\max(y_s) > 100 \times \text{mean}(y_s)$ .  
25  
26 b. Fewer than 250 subjects had valid measures (too much missing data).  
27  
28 c. Discreteness with severe imbalance, defined as  $>95\%$  of all sub- jects  
29 having the same SM value.  
30  
31
- 32 2. 190 measures from the T1-weighted structural brain analysis using  
33 FreeSurfer (including volumes of subcortical structures, and average  
34 thickness and surface area of many cortical regions) were excluded. The  
35 only structural brain measure included was the cube-root of whole brain  
36 volume (including ventricles).  
37  
38
- 39 3. 57 variables considered undesirable, in some cases because they are not  
40 sufficiently likely to be measures relating to brain function, and in some  
41 cases where “minor” measures are highly correlated with more major  
42 related measures. Thus we removed: “Is the subject in college?”; “Is the  
43 subject in a live-in relationship?”; “Is the subject born in Missouri?”; BMI  
44  
45  
46  
47  
48  
49  
50  
51  
52  
53  
54  
55  
56  
57  
58  
59  
60

self-report; thyroid/hypothyroid/endocrine measures; menstruation- related measures; fluid intelligence secondary measures of skipped tests and reaction time (as we included the highly correlated major measure of correct responses); all minor Delayed Discounting measures (that is, all except for the two major ones of area-under-the-curve for \$200 and \$40,000); all minor Sustained Attention (Short Penn Continuous Performance Test) measures (keeping the major measures of sensitivity and specificity); the minor Verbal Episodic Memory (Penn Word Memory Test) measure of reaction time; the minor Emotion Recognition (Penn Emotion Recognition Test) measure of Correct Responses Median Response Time; the minor visual Contrast Sensitivity (Mars Contrast Sensitivity) measure of error count; Age (as age range was limited to 26-30); Handedness; Employment status; "Whether blood was drawn for testing and measured hematocrit levels?"; Walking Endurance and Gait Speed; Physical Grip Strength; four measures relating to family history; color vision and eyeglass correction..

4. 41 measures of substance use that were highly similar to included measures or of no interest. This included 24 measures relating to alcohol consumption, and 9 measures relating to tobacco use, 3 measures relating to marijuana use, and 5 measures relating to past use of other drugs.

The full list of the 120 subject measures that were retained:

ASR\_Anxd\_Raw ASR\_Anxd\_Pct ASR\_Witd\_Raw ASR\_Witd\_Pct  
 ASR\_Soma\_Raw ASR\_Soma\_Pct ASR\_Thot\_Raw ASR\_Thot\_Pct  
 ASR\_Attn\_Raw ASR\_Attn\_Pct ASR\_Aggr\_Raw ASR\_Aggr\_Pct ASR\_Rule\_Raw  
 ASR\_Rule\_Pct ASR\_Intr\_Raw ASR\_Intr\_Pct ASR\_Oth\_Raw ASR\_Crit\_Raw  
 ASR\_Intn\_Raw ASR\_Intn\_T ASR\_Extn\_Raw ASR\_Extn\_T ASR\_TAO\_Sum  
 ASR\_Totp\_Raw ASR\_Totp\_T DSM\_Depr\_Raw DSM\_Depr\_Pct DSM\_Anxi\_Raw  
 DSM\_Anxi\_Pct DSM\_Somp\_Raw DSM\_Somp\_Pct DSM\_Avoid\_Raw  
 DSM\_Avoid\_Pct DSM\_Adh\_Raw DSM\_Adh\_Pct DSM\_Inat\_Raw  
 DSM\_Hype\_Raw DSM\_Antis\_Raw DSM\_Antis\_Pct SSAGA\_ChildhoodConduct  
 SSAGA\_PanicDisorder SSAGA\_Agoraphobia SSAGA\_Depressive\_Ep  
 SSAGA\_Depressive\_Sx Num\_Days\_Drank\_7days SSAGA\_Alc\_D4\_Ab\_Dx  
 Times\_Used\_Any\_Tobacco\_Today Total\_Cigarettes\_7days SSAGA\_Mj\_Ab\_Dep

1  
 2  
 3 MMSE\_Score PSQI\_Score PicSeq\_Unadj PicSeq\_AgeAdj CardSort\_Unadj  
 4 CardSort\_AgeAdj Flanker\_Unadj Flanker\_AgeAdj PMAT24\_A\_CR  
 5 ReadEng\_Unadj ReadEng\_AgeAdj PicVocab\_Unadj PicVocab\_AgeAdj  
 6 ProcSpeed\_Unadj ProcSpeed\_AgeAdj DDisc\_AUC\_200 DDisc\_AUC\_40K  
 7 VSPLIT\_TC VSPLIT\_CRTE VSPLIT\_OFF SCPT\_SEN SCPT\_SPEC  
 8 IWRD\_TOT ListSort\_Unadj ListSort\_AgeAdj ER40\_CR ER40ANG ER40FEAR  
 9 ER40NOE ER40SAD AngAffect\_Unadj AngHostil\_Unadj AngAggr\_Unadj  
 10 FearAffect\_Unadj FearSomat\_Unadj Sadness\_Unadj LifeSatisf\_Unadj  
 11 MeanPurp\_Unadj PosAffect\_Unadj Friendship\_Unadj Loneliness\_Unadj  
 12 PercHostil\_Unadj PercReject\_Unadj EmotSupp\_Unadj InstruSupp\_Unadj  
 13 PercStress\_Unadj SelfEff\_Unadj Dexterity\_Unadj Dexterity\_AgeAdj NEOFAC\_A  
 14 NEOFAC\_O NEOFAC\_C NEOFAC\_N NEOFAC\_E Odor\_Unadj Odor\_AgeAdj  
 15 PainInterf\_Tscore Taste\_Unadj Taste\_AgeAdj Mars\_Log\_Score Mars\_Final  
 16 Gender SSAGA\_Income SSAGA\_Educ BMI Weight Height BPSystolic  
 17 BPDiastolic HbA1C FS\_BrainSeg\_Vol  
 18  
 19  
 20  
 21

22 Descriptions of each subject measure can be found at

23 [wiki.humanconnectome.org/display/PublicData/HCP+Data+Dictionary+Public-](http://wiki.humanconnectome.org/display/PublicData/HCP+Data+Dictionary+Public-500+Subject+Release#HCPDataDictionaryPublic-500SubjectRelease)  
 24 [+500+Subject+Release#HCPDataDictionaryPublic-500SubjectRelease](http://wiki.humanconnectome.org/display/PublicData/HCP+Data+Dictionary+Public-500+Subject+Release#HCPDataDictionaryPublic-500SubjectRelease)  
 25  
 26  
 27

### 28 **Additional Cleaning Approaches not included in Type B processing**

#### 29 **Confound Regression**

30  
 31  
 32  
 33 Seven measures used by Smith and colleagues (Smith 2015) were regressed  
 34 across subjects from every edge (i.e. the relationship between a pair of ROIs).  
 35 Here, we also included hematocrit. Regression of these 8 measures was applied  
 36 at the population level to FC data obtained using both Type A and Type B  
 37 processing. The 8 confounds are listed in Figure 1.  
 38  
 39  
 40  
 41  
 42

#### 43 **CompCor**

44  
 45 Multiple regressors were generated by decomposition of white matter (5  
 46 regressors) and ventricle (5 regressors) timecourses using PCA (Behzadi et al.,  
 47 2007). The mean gray matter regressor was excluded. In the CompCor  
 48 processing regime, all other steps in Type B were unchanged.  
 49  
 50  
 51

#### 52 **Partial Correlation**

53  
 54 Because partial correlation performs best using maximally temporally separated  
 55 ROIs, the partial correlation processing stream was run using a 200-ROI ICA-  
 56  
 57  
 58  
 59  
 60

1  
2  
3 based parcellation rather than the 324-ROI Gordon-Laumann parcellation (Smith  
4 et al., 2013). Partial correlation was computed on Type A data using FSLNets  
5 (Smith et al., 2004) with L2 regularization at  $\rho = 0.01$ .  
6  
7  
8  
9

### 10 11 **Motion Influence P-values using correlation coefficient** 12

13  
14 Correlation coefficient based permutation cutoff:  $R < 0.274$  for  $p_{\text{perm}} < 0.05$ .  
15

16  
17 New Reconstruction (fig 3):

18 Type A FC:FD v FC:IQ –  $r = -0.31$ ,  $r^2 = 0.10$ ,  $p_{\text{perm}} = 0.026$

19 Type A FC:FD v FC:Beh –  $r = 0.50$ ,  $r^2 = 0.25$ ,  $p_{\text{perm}} < 0.0001$   
20  
21

22 Type B FC:FD v FC:IQ –  $r = -0.14$ ,  $r^2 = 0.02$ ,  $p_{\text{perm}} = 0.20$   
23  
24

25 Type B FC:FD v FC:Beh –  $r = 0.10$ ,  $r^2 = 0.01$ ,  $p_{\text{perm}} = 0.29$   
26  
27

28 All subjects (fig S4):

29 Type A FC:FD v FC:IQ –  $r = -0.20$ ,  $p_{\text{perm}} = 0.12$   
30  
31

32 Type A FC:FD v FC:Beh –  $r = 0.49$ ,  $p_{\text{perm}} < 0.0001$   
33  
34

35 Type B FC:FD v FC:IQ –  $r = -0.07$ ,  $p_{\text{perm}} = 0.37$   
36  
37

38 Type B FC:FD v FC:Beh –  $r = 0.0$ ,  $p_{\text{perm}} = 0.50$   
39  
40  
41  
42  
43  
44  
45  
46  
47  
48  
49  
50  
51  
52  
53  
54  
55  
56  
57  
58  
59  
60

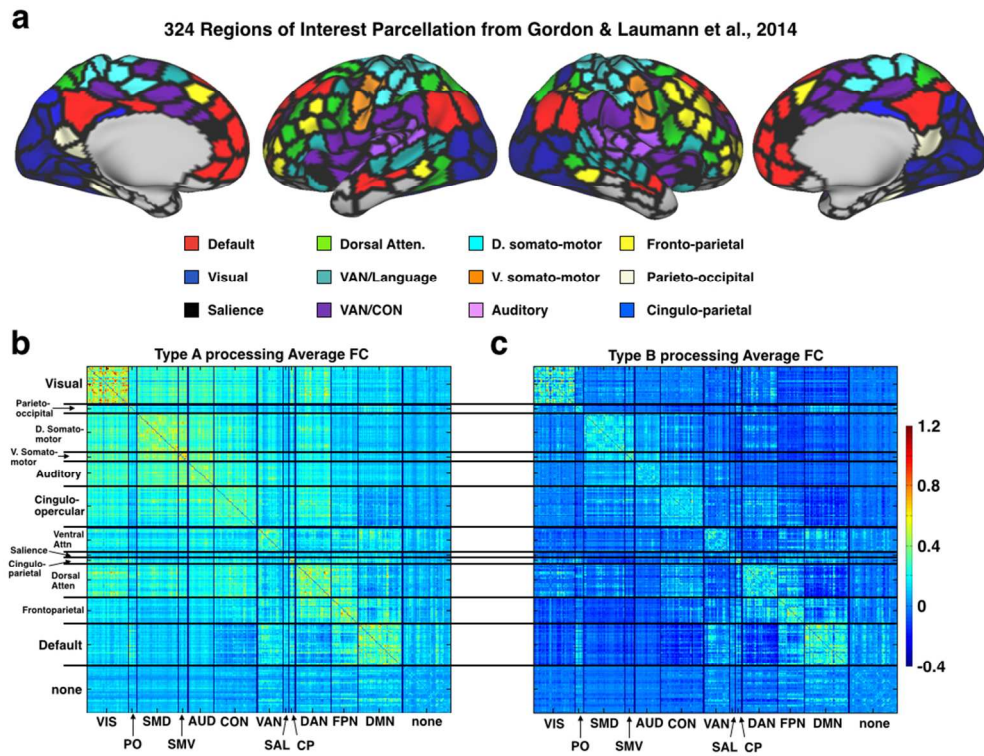

Figure S1. Cortical Parcellation and group average correlation values. (a) 324 region of interest parcellation from Gordon & Laumann et al., 2014. Regions are color coded by RSN membership. The average Fisher z-transformed correlation matrices are shown for all 457 subjects following Type A processing (b) and for 435 retained subjects following Type B processing (c).

92x70mm (300 x 300 DPI)

iew

1  
2  
3  
4  
5  
6  
7  
8  
9  
10  
11  
12  
13  
14  
15  
16  
17  
18  
19  
20  
21  
22  
23  
24  
25  
26  
27  
28  
29  
30  
31  
32  
33  
34  
35  
36  
37  
38  
39  
40  
41  
42  
43  
44  
45  
46  
47  
48  
49  
50  
51  
52  
53  
54  
55  
56  
57  
58  
59  
60



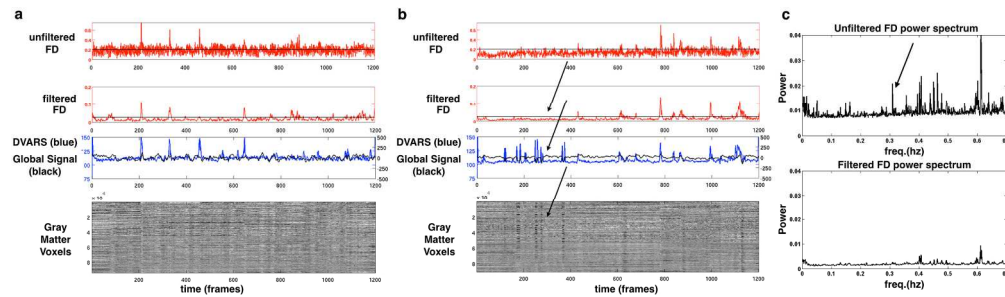

Figure S2: Pervasive high frequency noise in unfiltered FD traces. (a) The top panel shows 1200 frames of raw FD values (red trace) for subject 519950. The black line indicates a 0.2 FD cutoff for frame censoring, as implemented previously (Power et al. 2012, 2014). The panel second from the top shows FD values after low pass filtering with a 0.3Hz Butterworth filter (red trace) for the same run, with the black line indicating a 0.025 FD cutoff. The third and fourth panels show the corresponding DVARS values (blue trace), mean global signal (black trace), and gray plot. The frames that would be censored by use of the filtered FD values are well-aligned with peaks in the DVARS trace and perturbations in the gray plot characteristic of head motion (Power et al. 2012, 2014), whereas many more frames would be censored if the unfiltered FD values were used. (b) In some HCP R-fMRI runs, FD and DVARS do not correspond as well. Observe that for subject 510326 there are several peaks in the DVARS trace between frames 100 and 400 that are well-aligned with perturbations in the gray plot characteristic of head motion (Power et al. 2012, 2014); however, these peaks are not reflected in either FD trace (see black arrows). Thus, a DVARS threshold of 105% of median was used for scrubbing. (c) Spectrogram of FD traces before averaged across all runs from all subjects before (top) and after (bottom) low-pass filtering to remove the respiration peak. Prior to filtering, a peak is present above 0.3 hz (black arrow), consistent with respiration.

201x57mm (300 x 300 DPI)

Review



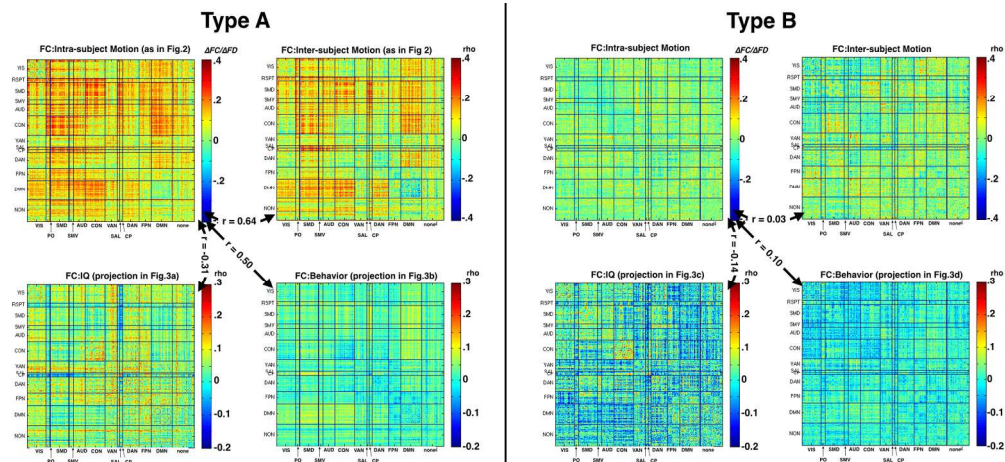

Figure S3: FC:FD and FD:Behavior relationships used in Figure 3 shown as matrices. Arrows between matrices provide Pearson correlation coefficients between matrices. RSN abbreviations: VIS = Visual network (38 ROIs), PO = parieto-occipital (7 ROIs), SMD = dorsal somato-motor (37 ROIs); SMV = ventral somato-motor (8 ROIs); AUD = auditory (23 ROIs); CON = cingulo-opercular (39 ROIs); VAN = ventral attention (23 ROIs); SAL = Saliency (4 ROIs), CP = Cingulo-parietal (5 ROIs), DAN = dorsal attention network (32 ROIs); FPN = frontoparietal control network (24 ROIs); DMN = default mode network (40 ROIs), NON = no assigned network (44 ROIs).

172x79mm (300 x 300 DPI)

Review

1  
2  
3  
4  
5  
6  
7  
8  
9  
10  
11  
12  
13  
14  
15  
16  
17  
18  
19  
20  
21  
22  
23  
24  
25  
26  
27  
28  
29  
30  
31  
32  
33  
34  
35  
36  
37  
38  
39  
40  
41  
42  
43  
44  
45  
46  
47  
48  
49  
50  
51  
52  
53  
54  
55  
56  
57  
58  
59  
60

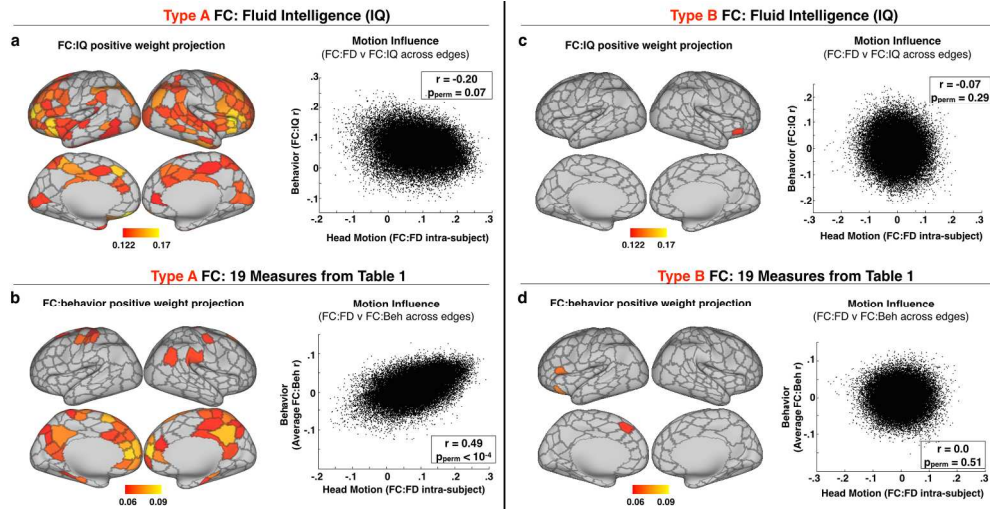

Figure S4. Motion influence on FC: across all 457 subject. Results presented here are calculated in a manner identical to Figure 3, except all 457 subjects (including those with reconstruction software version 1) were included.

186x94mm (300 x 300 DPI)

1  
2  
3  
4  
5  
6  
7  
8  
9  
10  
11  
12  
13  
14  
15  
16  
17  
18  
19  
20  
21  
22  
23  
24  
25  
26  
27  
28  
29  
30  
31  
32  
33  
34  
35  
36  
37  
38  
39  
40  
41  
42  
43  
44  
45  
46  
47  
48  
49  
50  
51  
52  
53  
54  
55  
56  
57  
58  
59  
60

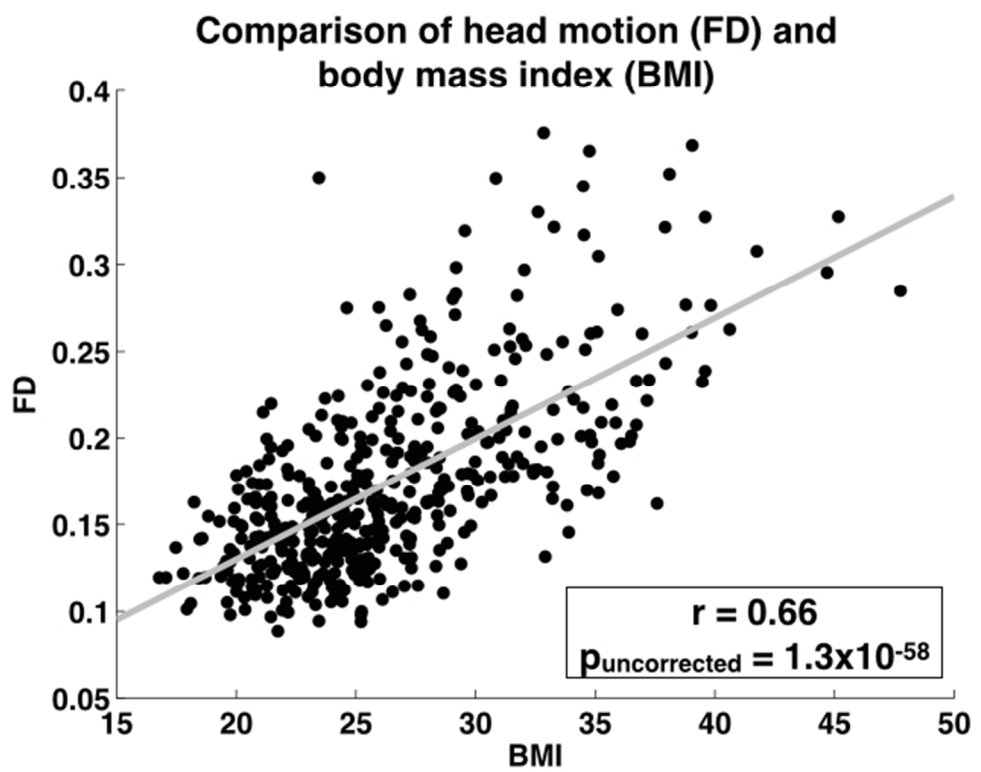

Figure S5. Average in scanner head movement versus Body Mass Index.

55x44mm (300 x 300 DPI)

view
